# Supplementary material for: Serine Proteases of Malaria Parasite Plasmodium falciparum: Potential as Antimalarial Drug Targets
Source: Interdiscip Perspect Infect Dis. 2014 Mar 11;2014:453186. doi: 10.1155/2014/453186 (PMC3988940; doi:10.1155/2014/453186)
Supplement: Supplementary file 1 — Table S1. List of P. falciparum serine proteases of different classes with their functional domains Genes encoding for P. falciparum serine proteases of chymotrypsin, subtilisin and rhomboid protease clans and their orthologs found in PlasmoDB database (http://www.plasmodb.org/) are listed in the table. Domains present in these proteins were identified by sequence search against Pfam database (http://www.pfam.sanger.ac.uk/). Functions of these proteins if known from published literature are also listed. Table S2. List of P. falciparum serine proteases with their expression at asexual and sexual stages of the parasite Highest expression of P. falciparum serine proteases at asexual blood stages as determined by microarray analysis and mass spectrometry-based evidence of expression at asexual and sexual stages as deposited in PlasmoDB database (http://www.plasmodb.org/) are presented. Ring, trophozoite and schizont represent asexual blood stage forms. [file 453186.f1.zip]

Archive with 2 entries (2 files):
- 453186.f1/453186.f1.docx
- 453186.f1/453186.f2.docx
